## Correction: Highly Nonrandom Features of Synaptic Connectivity in Local Cortical Circuits

Sen Song, Per Jesper Sjöström, Markus Reigl, Sacha Nelson, Dmitri B. Chklovskii

DOI: 10.1371/journal.pbio.0030068

In *PLoS Biology*, volume 3, issue 3.

In the caption for Figure 5A, the formula for the lognormal fit was given as follows:

$$p[w] = 0.426 \exp[-(\ln[w] + 0.702)^2 / (2 \times 0.9355^2)] / w.$$

The second squaring exponent should have been inside the parentheses, so it reads as follows:

$$p[w] = 0.426 \exp[-(\ln[w] + 0.702)^2 / (2 \times 0.9355^2)] / w.$$

This correction note may be found online at DOI: 10.1371/journal.pbio.0030350.

Published October 11, 2005

Citation: (2005) Correction: Highly nonrandom features of synaptic connectivity in local cortical circuits.

PLoS Biol 3(10): e350.

## Correction: Directed Migration of Positively Selected Thymocytes Visualized in Real Time

Colleen M. Witt, Subhadip Raychaudhuri, Brian Schaefer, Arup K. Chakraborty, Ellen A. Robey

DOI: 10.1371/journal.pbio.0030160

In *PLoS Biology*, volume 3, issue 6.

The following statement in the last paragraph of the Results contains a factual error: "A total of 34% of cortical thymocytes expressing the P14 TCR had motility rates greater than 13  $\mu\text{m}/\text{min}$  compared to approximately 2% for wild-type thymocytes expressing diverse TCRs." The sentence should read as follows: "A total of 20% of cortical thymocytes expressing the P14 TCR had motility rates greater than 13  $\mu\text{m}/\text{min}$  compared to approximately 2% for wild-type thymocytes expressing diverse TCRs."

The authors apologize for any confusion this error may have caused.

This correction note may be found online at DOI: 10.1371/journal.pbio.0030373.

Published October 11, 2005

Citation: (2005) Correction: Directed migration of positively selected thymocytes visualized in real time. *PLoS Biol* 3(10): e373.

## Correction: Traces of Archaic Mitochondrial Lineages Persist in Austronesian-Speaking Formosan Populations

Jean A. Trejaut, Toomas Kivisild, Jun Hun Loo, Chien Liang Lee, Chun Lin He, Chia Jung Hsu, Zheng Yuan Lee, Marie Lin

DOI: 10.1371/journal.pbio.0030247

In *PLoS Biology*, volume 3, issue 8.

The seventh author's name was originally misspelled as Zheng Yuan Li; it should be Zheng Yuan Lee.

The first sentence of the Materials and Methods should read as follows:

"In this study the sequence variation of the mtDNA D-loop HVS-I and HVS-II regions, nps 16006 to 16397 and nps 53 to 404, respectively, was analyzed in 640 samples drawn from nine Taiwan indigenous mountain tribes representative of most languages, cultures, and geographical settlements seen on the island before the last four centuries."

The first two sentences in the section "Data Sequence Analysis" in the Materials and Methods should read as follows:

"Using primer pairs L15997–H16401 and L048–H408 [59], segments of 404 bps and 360 bps from the D-loop HVS-I and HVS-II, respectively, were obtained. Primer pairs 5, 7, 8, 11–14, 19, and 24 F&R described in Rieder et al. [60]...."

This correction note may be found online at DOI: 10.1371/journal.pbio.0030376.

Published October 11, 2005

Citation: (2005) Correction: Traces of archaic mitochondrial lineages persist in Austronesian-speaking Formosan populations. *PLoS Biol* 3(10): e376.
